# Supplementary material for: PCR-based detection of pathogens in improved water sources: a scoping review protocol of the evidence in low-income and middle-income countries
Source: HighWire-hosted journal article supplement (doi:10.1136/bmjopen-2021-057154), 2022-05-01
Supplement: bmjopen-2021-057154supp001_data_supplement.pdf [file bmjopen-2021-057154supp001_data_supplement.pdf]

**Additional file 1. Search strategy**

| S. No | Query                                                                                                                                                           |
|-------|-----------------------------------------------------------------------------------------------------------------------------------------------------------------|
| 1.    | "Polymerase chain reaction"[MeSH] OR Polymerase chain reaction[tw] OR PCR(tw)                                                                                   |
| 2.    | Detection (tw) OR Identification (tw) OR Characterization(tw)                                                                                                   |
| 3.    | Pathogenic microbes (tw) OR "bacteria"[MeSH] OR Bacteria[Text Word] OR "escherichia coli"[MeSH s] OR E. coli[tw]OR "viruses"[MeSH] OR Virus[tw]OR Protozoa (tw) |
| 4.    | Improved water (tw) OR "drinking water"[MeSH] OR Drinking water[tw]                                                                                             |
| 5.    | 1 AND 2 AND 3 AND 4                                                                                                                                             |
| 6.    | Low- and middle-income countries (tw) OR Africa (tw) OR Asia (tw) OR Caribbean Countries (tw)                                                                   |
| 7.    | 5 AND 6                                                                                                                                                         |
| 8.    | Limit 7 to English                                                                                                                                              |

MeSH=Medical subject headings, tw=text word
