# Supplementary material for: PCR-based detection of pathogens in improved water sources: a scoping review protocol of the evidence in low-income and middle-income countries
Source: HighWire-hosted journal article supplement (doi:10.1136/bmjopen-2021-057154), 2022-05-01
Supplement: bmjopen-2021-057154supp002_data_supplement.pdf [file bmjopen-2021-057154supp002_data_supplement.pdf]

## **Additional file 2 Data extraction tool**

### **General information for the study**

- Databases with dates of coverage
- Authors' name
- Year of publication
- Study population and/or sample size
- Study period
- Country/place of origin: where the study was published or conducted - Low and middle income countries.

### **Specific information in the study**

- Water samples taken from: at the sources or households container
- Type of water sources: Piped system connected to yard, piped system connected to public stand, on spot springs, shallow wells, hand dug wells and rain water harvesting.
- Water treatment technique, if any
- Associated water borne diseases: diarrhea, intestinal tract infection and parasites.
- Detection methods/techniques: nucleic-acid based (DNA or RNA) method/s- PCR and PCR plus culture.
- Key findings/result of included studies that relate to the scoping review question/s
  - Type of waterborne pathogen: diarrhea, intestinal tract infection and parasites.
  - Magnitude in proportion/rate and
  - Magnitude in concentrations
